# Supplementary material for: Decellularization of caprine forestomach rumen tissue modified with silver nanowires as an antibacterial skin substitute scaffold in wound care therapeutics
Source: Royal Society of Chemistry journal article supplement (doi:10.1039/d4tb01560f), 2024-01-01
Supplement: d4tb01560f1.pdf [file d4tb01560f1.pdf]

**Appendix A Supplementary Information**

*Decellularization of caprine forestomach rumen tissue modified with silver nanowires as an antibacterial skin substitute scaffold in wound care therapeutics*

*Athmana P A<sup>a</sup>, Asna Jaleel K I<sup>a</sup>, Sinduja Malarkodi Elangovan<sup>b</sup>, Riza Paul<sup>c</sup>, Naveen Subbaiyan<sup>d</sup>, Parthiban Shanmugam<sup>c,e</sup> Gopal Shankar Krishnakumar<sup>a\*</sup>*

*<sup>a</sup> Department of Bioscience and Engineering, National Institute of Technology, Calicut, Kerala, India.*

*<sup>b</sup> Department of Biotechnology, Rajalakshmi Engineering College, Chennai, Tamil Nadu, India.*

*<sup>c</sup> Advanced Materials and Devices Laboratory, PSG Institute of Advanced Studies, Peelamedu, Coimbatore, Tamil Nadu, India*

*<sup>d</sup> Department of Mechanical Engineering, Saveetha School of Engineering Saveetha Institute Of Medical And Technical Sciences, Chennai, Tamil Nadu, India.*

*<sup>e</sup> Department of Physics, Centre for Research and Development, KPR Institute of Engineering and Technology, Coimbatore, Tamil Nadu, India*

**Corresponding Author**

*Dr. Gopal Shankar Krishnakumar*

*Assistant Professor Grade I, Department of Bioscience and Engineering*

National Institute of Technology, Calicut, Kerala, India

Email: [gopalshankar.k@gmail.com](mailto:gopalshankar.k@gmail.com), [gopalshankar@nitc.ac.in](mailto:gopalshankar@nitc.ac.in)

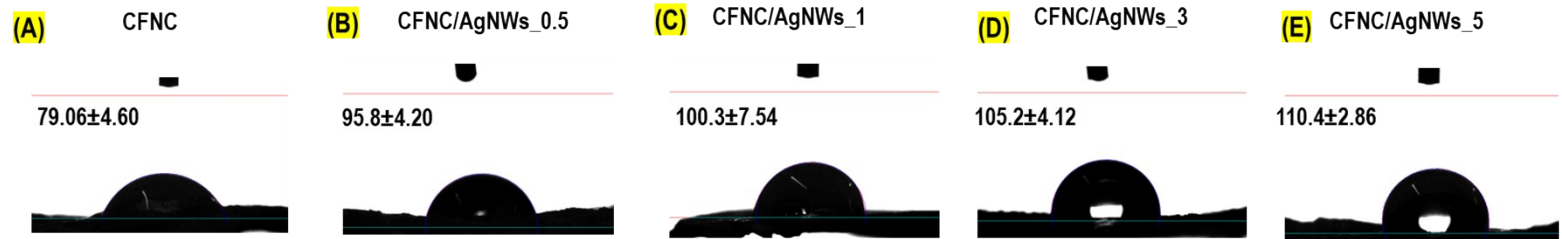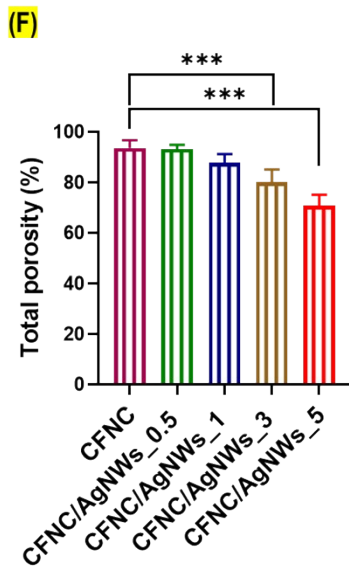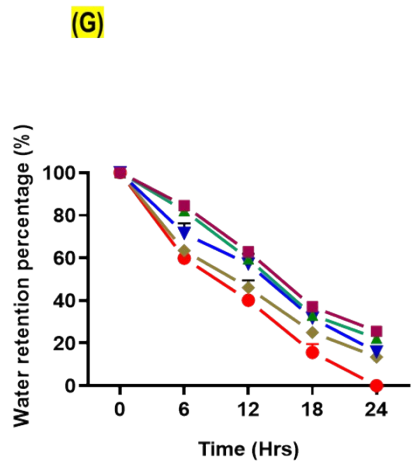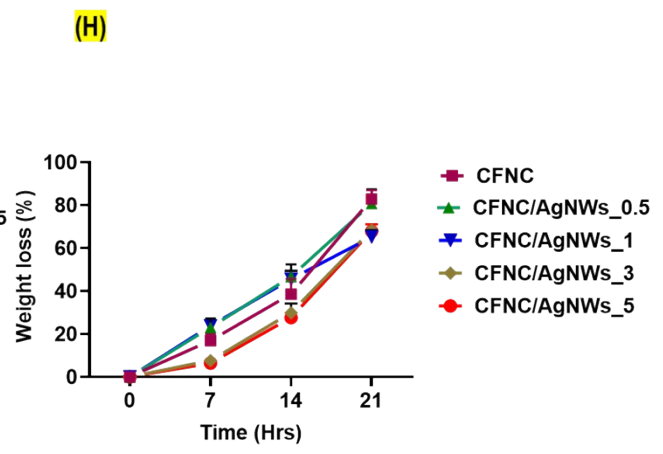

**Figure S1:** (A-E): Contact angle measurements of CFNC/AgNWs scaffolds, (F): Total porosity of CFNC/AgNWs scaffolds, (G):  $W_R$  (%) of CFNC/AgNWs scaffolds as a function of time, (H): Biodegradation of CFNC/AgNWs scaffolds as a function of time. Asterisk indicates level of significance for (\*\*\*)  $p \leq 0.001$

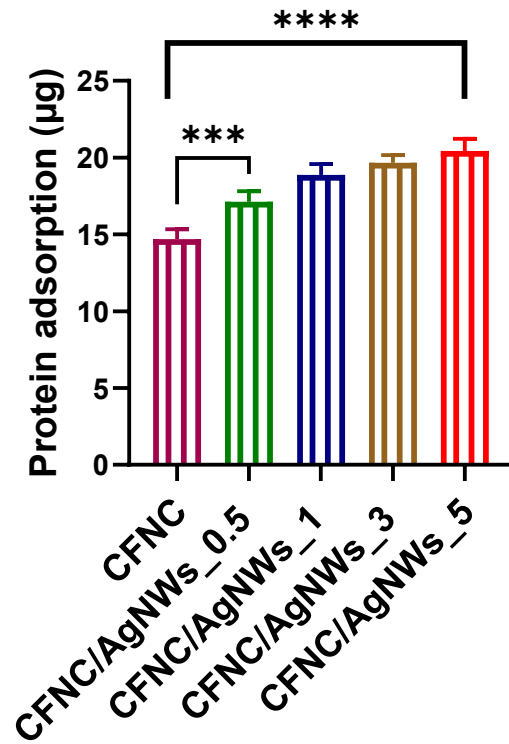

**Figure S2:** Protein adsorption in CFNC/AgNWs scaffolds. Asterisk indicates level of significance for ( $****p \leq 0.0001$ ) and ( $***p \leq 0.001$ ).

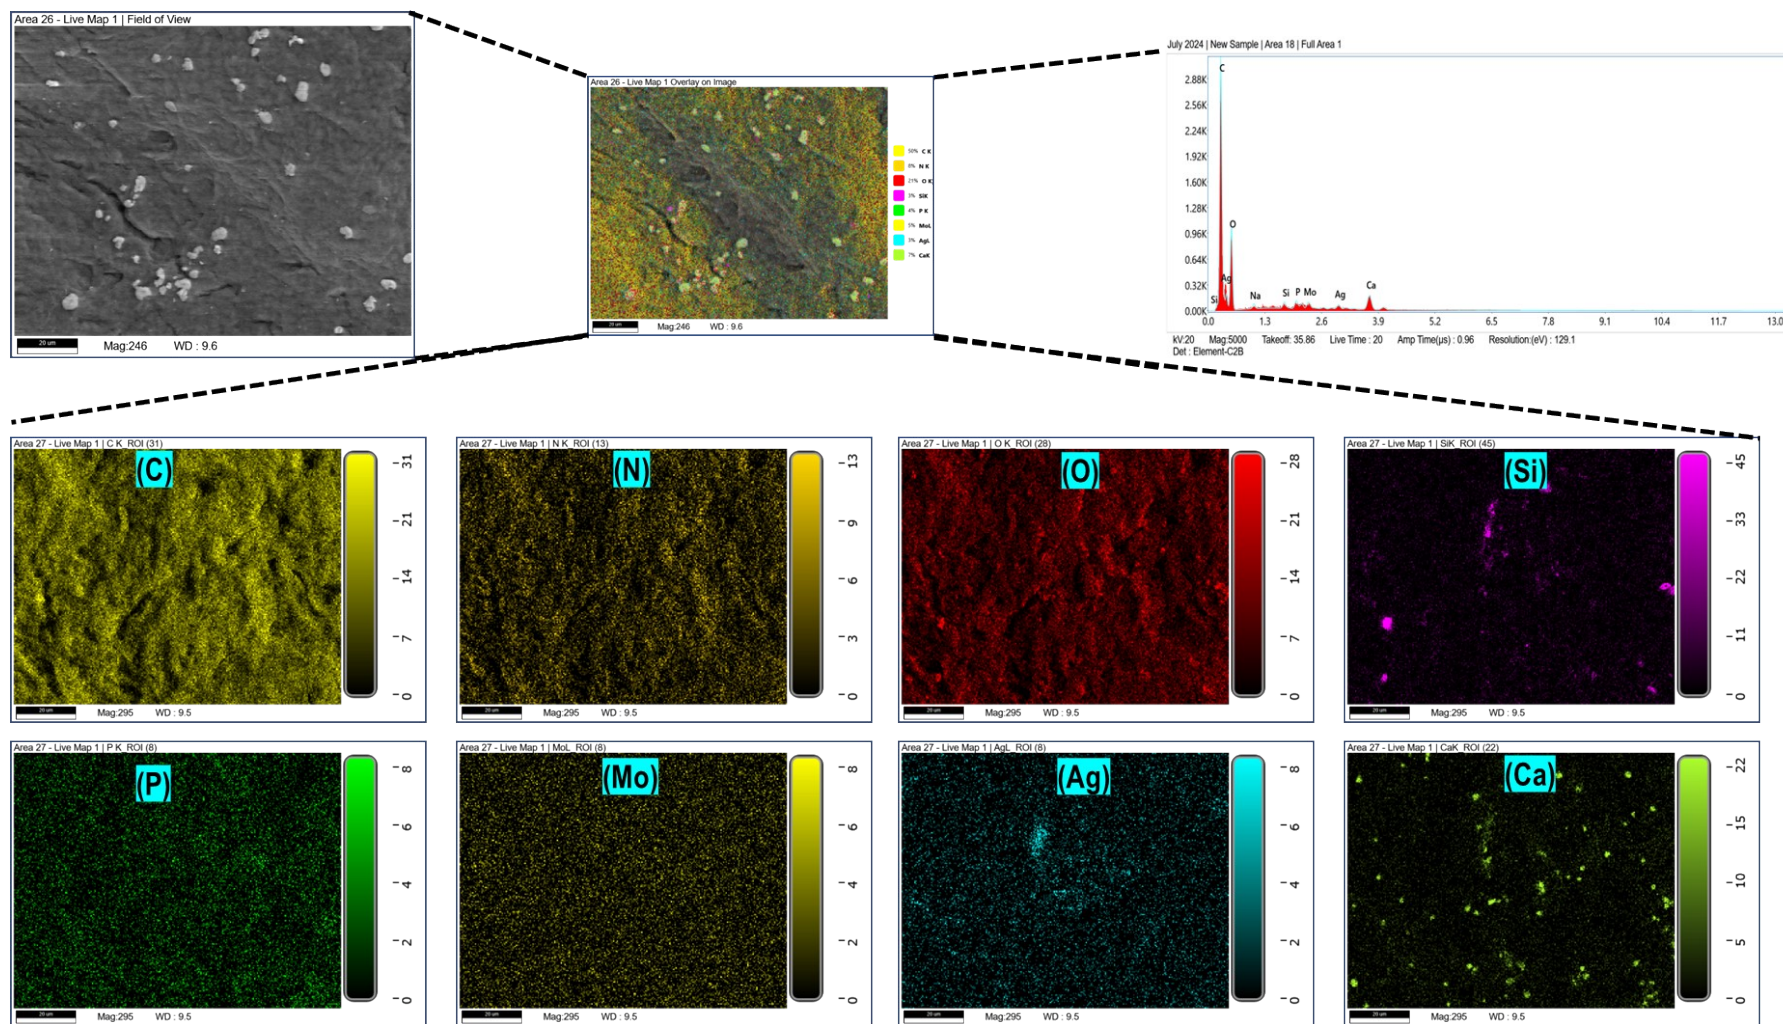

**Figure S3:** Elemental mapping analysis showing the presence of different elements present in CFNC/AgNWs\_5 scaffold group.

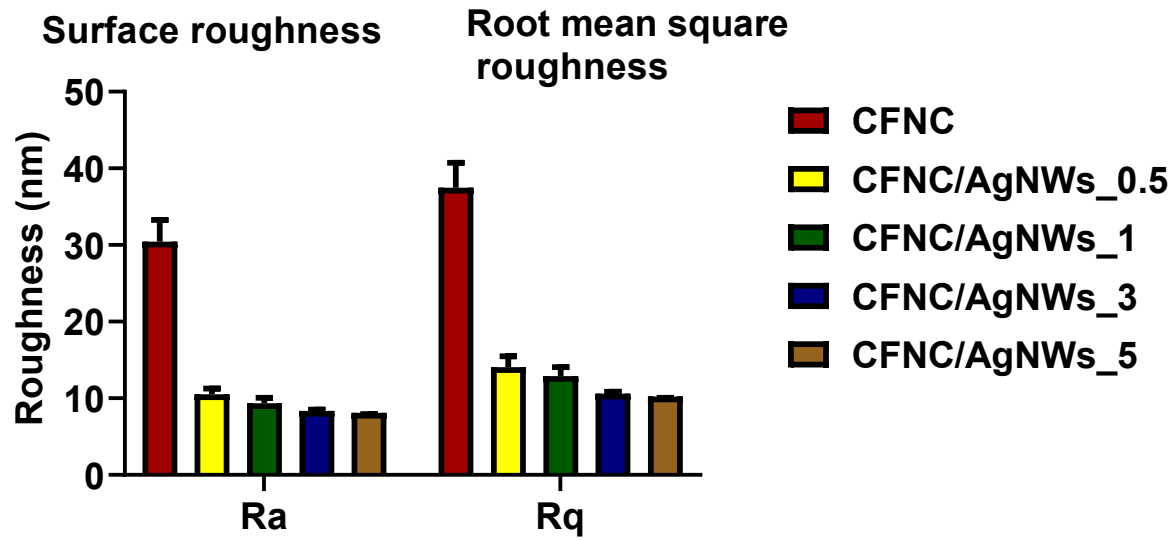

Figure S4: Surface roughness and root mean square roughness of CFNC/AgNWs scaffolds.

| Elements | CFNC | CFNC/AgNWs_0.5 | CFNC/AgNWs_1 | CFNC/AgNWs_3 | CFNC/AgNWs_5 |
|----------|------|----------------|--------------|--------------|--------------|
|----------|------|----------------|--------------|--------------|--------------|

|                 |       |       |       |       |       |
|-----------------|-------|-------|-------|-------|-------|
| <b>C K (%)</b>  | 66.39 | 69.81 | 69.57 | 68.54 | 67.41 |
| <b>N K (%)</b>  | 31.94 | 28.31 | 28.67 | 28.98 | 28.76 |
| <b>O K (%)</b>  | 0.51  | 0.03  | 0.09  | 0.31  | 0.44  |
| <b>Si K (%)</b> | 0.12  | 0.07  | 0.11  | 0.11  | 0.26  |
| <b>P K (%)</b>  | 0.18  | 0.22  | 0.19  | 0.27  | 0.41  |
| <b>Ca K (%)</b> | 0.40  | 0.70  | 0.48  | 0.95  | 1.40  |
| <b>Mo L (%)</b> | 0.43  | 0.69  | 0.71  | 0.64  | 0.72  |
| <b>Ag L (%)</b> | 0.03  | 0.16  | 0.17  | 0.21  | 0.61  |

**Table S1:** EDX element composition of different elements in CFNC/AgNWs scaffolds.
